# Supplementary material for: All-small-molecule organic solar cells with over 14% efficiency by optimizing hierarchical morphologies
Source: PubMed Central journal article supplement (PMC6879588; doi:10.1038/s41467-019-13292-1), 2019-11-26
Supplement: 41467_2019_13292_MOESM1_ESM.pdf [file 41467_2019_13292_MOESM1_ESM.pdf]

## Supplementary Information

for

### All Small Molecule Organic Solar Cells with Over 14% Efficiency by Optimizing Hierarchical Morphologies

*Ruimin Zhou<sup>1,2,3,4</sup>, Zhaoyan Jiang<sup>1,2</sup>, Chen Yang<sup>1,2</sup>, Jianwei Yu<sup>5</sup>, Jirui Feng<sup>6</sup>, Muhammad Abdullah Adil<sup>1,2</sup>, Dan Deng<sup>1</sup>, Wenjun Zou<sup>1</sup>, Jianqi Zhang<sup>1</sup>, Kun Lu<sup>1</sup>,\* Wei Ma<sup>6</sup>,\* Feng Gao<sup>5</sup>,\* and Zhixiang Wei<sup>1,2</sup>\**

<sup>1</sup>CAS key laboratory of nanosystem and hierarchical fabrication, CAS Center for Excellence in Nanoscience, National Center for Nanoscience and Technology, Beijing 100190, China.

<sup>2</sup>University of Chinese Academy of Sciences, Beijing 100049, China.

<sup>3</sup>Sino-Danish Center for Education and Research, Sino-Danish College, University of Chinese Academy of Sciences, Beijing 100190, China.

<sup>4</sup>Nano-Science Center & Department of Chemistry, University of Copenhagen, Copenhagen DK-2100, Denmark

<sup>5</sup>Department of Physics Chemistry and Biology (IFM), Linköping University, Linköping SE-58183, Sweden.

<sup>6</sup>State Key Laboratory for Mechanical Behavior of Materials, Xi'an Jiaotong University, Xi'an 710049, China.

These authors contributed equally: Ruimin Zhou, Zhaoyan Jiang

Correspondence and requests for materials should be addressed to K.L. (email: [lvk@nanoctr.cn](mailto:lvk@nanoctr.cn)) or to W.M. (email: [msewma@xjtu.edu.cn](mailto:msewma@xjtu.edu.cn)) or to F.G. (email: [feng.gao@liu.se](mailto:feng.gao@liu.se)) or to Z.W. (email: [weizx@nanoctr.cn](mailto:weizx@nanoctr.cn))

## Supplementary Figures

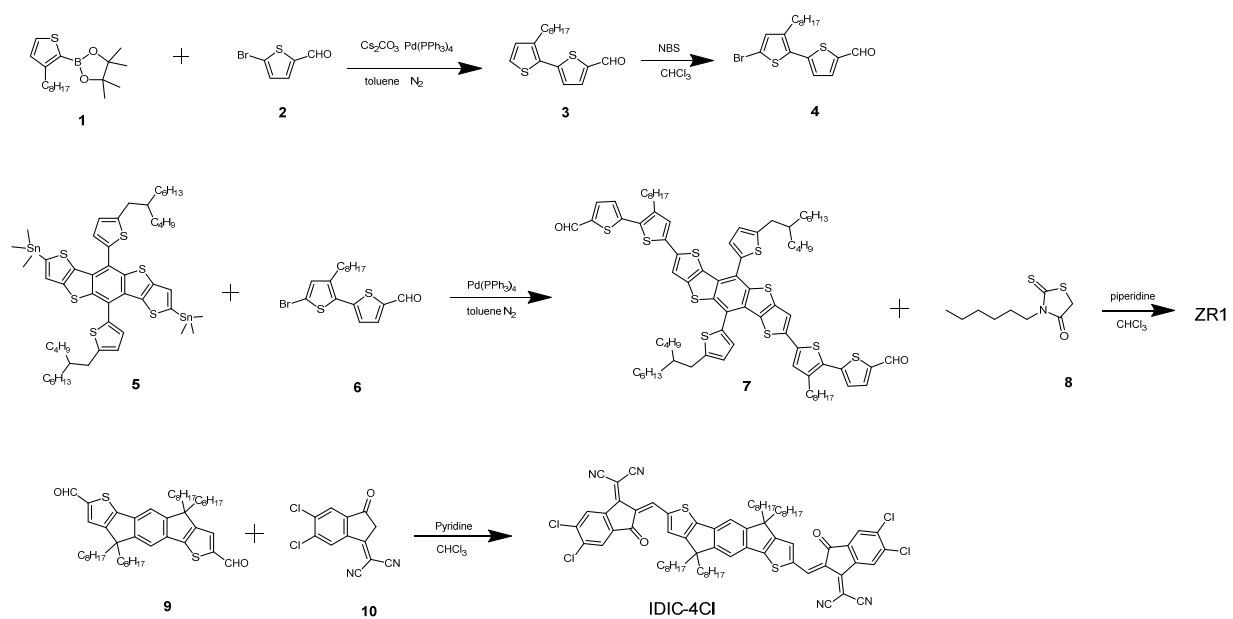

**Supplementary Figure 1.** Synthetic routes of ZR1 and IDIC-4Cl (The details of above molecules are given in the Supplementary Methods).

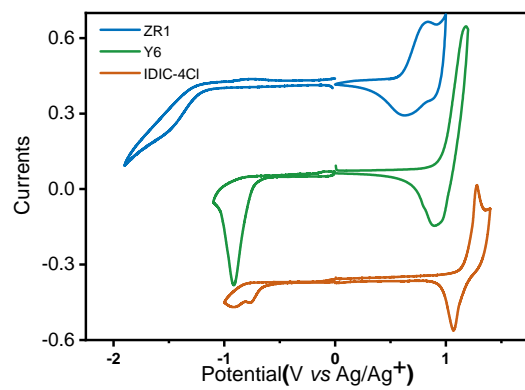

**Supplementary Figure 2.** Cyclic voltammogram (CV) plots of ZR1 (blue), Y6 (green) and IDIC-4Cl (red) in films.

测试报告  
Test Report

报告编号 GXc2019-2261  
Report No.

客户名称  
Client 国家纳米科技中心  
National Center for Nanoscience and Technology

样品名称  
Sample 有机太阳能电池  
Organic solar cell

型号规格  
Type/Model 全小分子有机太阳能电池  
All Small Molecular Organic Solar Cell

出厂编号  
Serial No. 23-10-M5-F-01

生产厂商  
Manufacturer 国家纳米科技中心  
National Center for Nanoscience and Technology

客户地址  
Client Address 中关村北一条11号  
No.11 BeiYiTiao, ZhongGuanCun

测试日期  
Date of Test 2019-08-30

批准人:   
Approved by

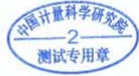

地址: 中国 北京 北三环东路18号 邮编: 100029  
Address: No.18 Bei San Huan Dong Lu, Beijing, P.R. China Post Code

电话: +86-10-64525697/4 传真: +86-10-64271948  
Tel Fax

网址: http://www.nim.ac.cn 电子邮箱: kehu@nim.ac.cn  
Website Email

2019-cs

报告编号 GXc2019-2261  
Certificate No.

中国计量科学研究院 (NIM) 是国家最高计量科学研究中心和国家级法定计量技术机构, 1999 年授权签署了国际计量委员会 (CIPM) (国家计量基准和国家计量院签发的校准与测量证书互认协议 (CIPM MRA)). The National Institute of Metrology (NIM) is China's national metrology institute (NMI) and a state-level legal metrology institute. NIM is China's signatory to the Mutual Recognition of National Measurement Standards and of Calibration and Measurement Certificates issued by National Metrology Institutes (CIPM MRA) which is arranged by the International Committee of Weights and Measures (CIPM). 资质管理体系符合 ISO/IEC 17025 标准, 通过合格评定国家认可委员会 (CNAS) 和亚太计量规划组织 (APMP) 联合评审的校准和测量能力 (CMCs) 在国际计量局 (BIPM) 关键比对数据库公布。NIM's quality management system meets requirements of the ISO/IEC 17025. Its Calibration and Measurement Capabilities (CMCs) that are peer reviewed both by China National Accreditation Service for Conformity Assessment (CNAS) and the Asia Pacific Metrology Programme (APMP) are published in the International Bureau of Weights and Measures (BIPM) Key Comparison Database (KCDDB). 2011 年, NIM 和 CNAS 通过国际互认技术评价活动签署了谅解备忘录, 承认 NIM 的计量支撑作用和出具的校准/检测结果的溯源效力。NIM and CNAS signed a Memorandum of Understanding (MOU) for Recognition of Technical Assessment in Laboratory Accreditation Field in 2011, in which CNAS recognizing the technical supporting role of NIM in laboratory accreditation and the traceability of NIM's calibration / test results.

测试所依据参考的技术文件 (代号, 名称) Reference documents (Code, Name)  
参照 Measurement of photovoltaic current-voltage characteristics (IEC60904-1)-2017  
依据光伏电池校准规范: 光伏性能 (JJF 1622-2017) (Calibration Specification of Solar Cells: Photoelectric Properties)

测试环境条件及地点 Testing place and environment:  
温度 (23.2±2) °C 地点 Location: 中国计量院光学楼 110 室  
湿度 Humidity: (49.1±2) %RH 其它 Others: /  
测试使用的计量器具 (标) 名称 (含标准物质) 主要仪器  
Reference Standards (Including Reference Material) Instruments used

| 名称<br>Name                                | 测量范围<br>Measurement Range          | 不确定度<br>准确度等级<br>Uncertainty/Accuracy                                                                                       | 证书编号<br>Certificate No. | 证书有效期至<br>Due Date<br>(YYYY-MM-DD) |
|-------------------------------------------|------------------------------------|-----------------------------------------------------------------------------------------------------------------------------|-------------------------|------------------------------------|
| 标准太阳能电池<br>Reference solar cell           | $I_{sc}$ : (9-200) mA              | 0.9% (k=2)                                                                                                                  | GXc2019-0418            | 2020-03-06                         |
| 小面积单晶硅太阳<br>标准源<br>Steady solar simulator | (100-1100) nm                      | AAA 级                                                                                                                       | GXc2019-0224            | 2020-02-13                         |
| 源表<br>Source meter                        | DC-V:<br>10mV-10V<br>DC-I:100nA-1A | (5·10 <sup>-5</sup> ·10 <sup>-10</sup> ) <sup>+</sup> (k=2)<br>(10 <sup>-10</sup> ·40·10 <sup>10</sup> ) <sup>+</sup> (k=2) | DLc2019-0024            | 2020-01-03                         |

2019-cs

报告编号 GXc2019-2261  
Report No.

测试结果  
Test Results

1. 测试条件 Test Conditions:  
标准太阳能电池: 单晶硅 (814)  
Reference Solar Cell: mono-Si (814)  
太阳模拟器: 双光源太阳模拟器, AAA 级;  
Solar Simulator Classification: double-light source in AAA classification;  
温度传感器控制系统: 无;  
Temperature Sensor/Control System: None;  
扫描方向: 正扫  
Scan Direction: forward  
电压范围: -0.10V~1.00V; 间隔: 0.01V  
Scan Parameter: From -0.10V to 1.00V with 0.01V interval  
光阑 Mask (Y/N): Y  
扫描时间: 34 秒 扫描点数: 111  
Scan Time: 34 s Scan Point: 111

2. I-V 特性参数 I-V Characteristic parameters:  
以上标准太阳能电池标定太阳模拟器辐照度至 1000 W/m<sup>2</sup>, 校准被测太阳能电池的 I-V 特性曲线和参数如下:  
By using the above reference solar cell to calibrate the solar simulator's irradiance to 1000 W/m<sup>2</sup>, the I-V characteristic curve and parameters as follows:

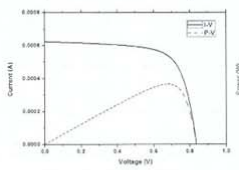

2019-cs

报告编号 GXc2019-2261  
Report No.

测试结果  
Test Results

| 有效面积<br>(mm <sup>2</sup> ) | 短路电流<br>$I_{sc}$ (mA)  | 开路电压<br>$V_{oc}$ (V) | 最大功率<br>$P_{max}$ (mW)  |
|----------------------------|------------------------|----------------------|-------------------------|
| 2.600                      | 0.624                  | 0.836                | 0.366                   |
| 最大功率电流<br>$I_{mp}$ (mA)    | 最大功率电压<br>$V_{mp}$ (V) | 填充因子<br>FF (%)       | 转换效率(PCE)<br>$\eta$ (%) |
| 0.538                      | 0.680                  | 70.2                 | 14.1                    |

注 Note:  
1. 测试所用 mask 的面积为 2.600 mm<sup>2</sup> (证书编号: CDc2019-3736)。  
The mask area is 2.600 mm<sup>2</sup> (Certificate No.: CDc2019-3736).  
2. 此数据仅对被测样品当时状态有效。  
The data apply only at the time of the test for the sample.  
(以下空白)

声明 Statement:  
1. 我院仅对加盖“中国计量科学研究院专用章”的完整报告负责。  
NIM is ONLY responsible for the complete report with the test stamp of NIM.  
2. 本报告的测试结果仅对所测试的样品有效。  
The report is ONLY valid for the tested sample or instrument.  
3. 本报告用中英文两种语言表述, 两种语言以中文为准。  
The report is expressed in both English and Chinese, with the Chinese version as standard.

测试员:   
Tested by

核验员:   
Checked by

2019-cs

Supplementary Figure 3. Certification of the photovoltaic efficiency of the ZR1: Y6 devices by National Institute of Metrology, China (NIM).

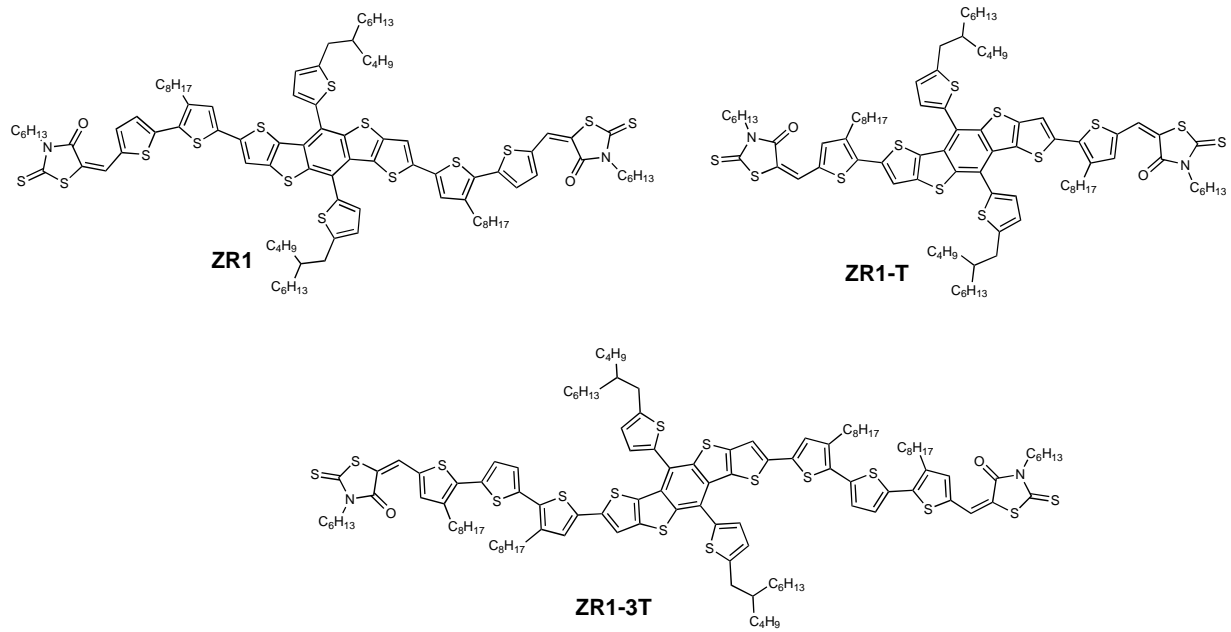

**Supplementary Figure 4.** ZR1, ZR1-T, ZR1-3T molecular structures.

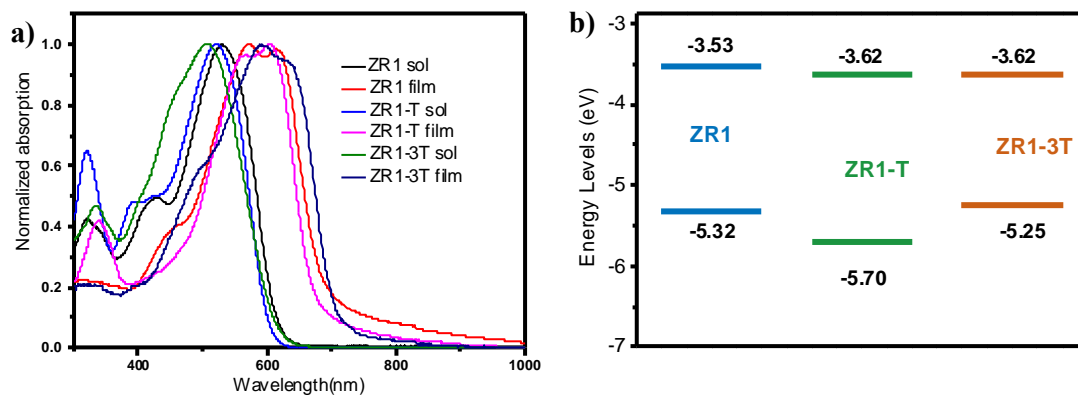

**Supplementary Figure 5. a)** Normalized UV-vis absorption spectra of ZR1, ZR1-T, ZR1-3T in solution and thin films. **b)** Energy diagrams of ZR1, ZR1-T, ZR1-3T

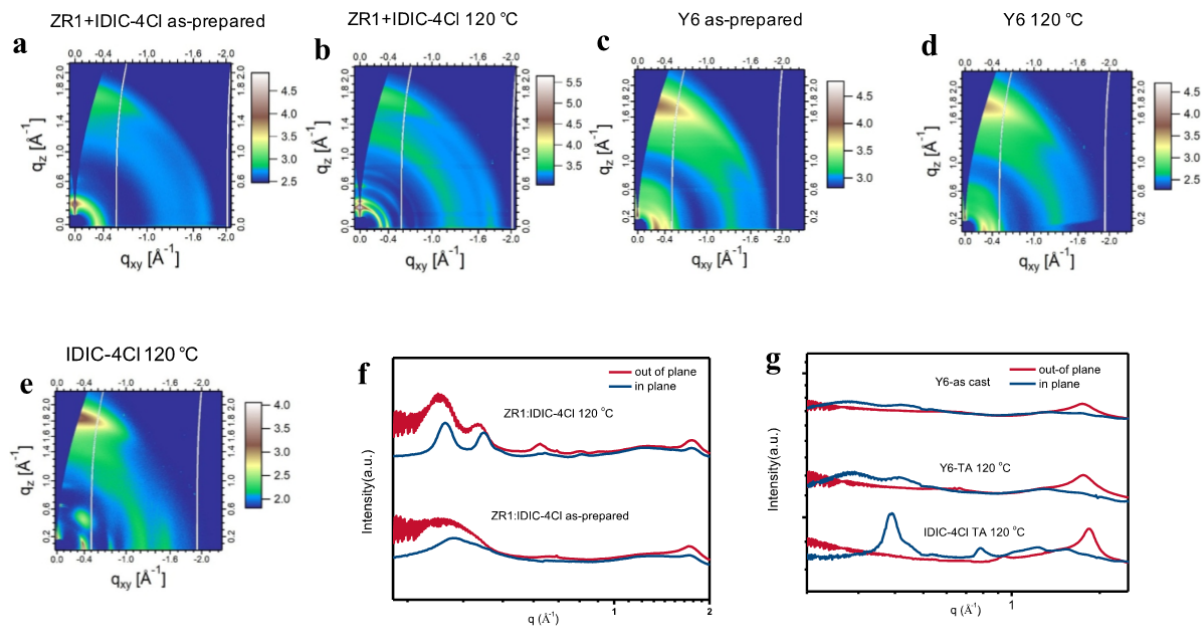

**Supplementary Figure 6.** (a–e) 2D GIWAXS patterns in pristine films and in blend films; (f-g) corresponding out-of-plane curves and in-plane curves.

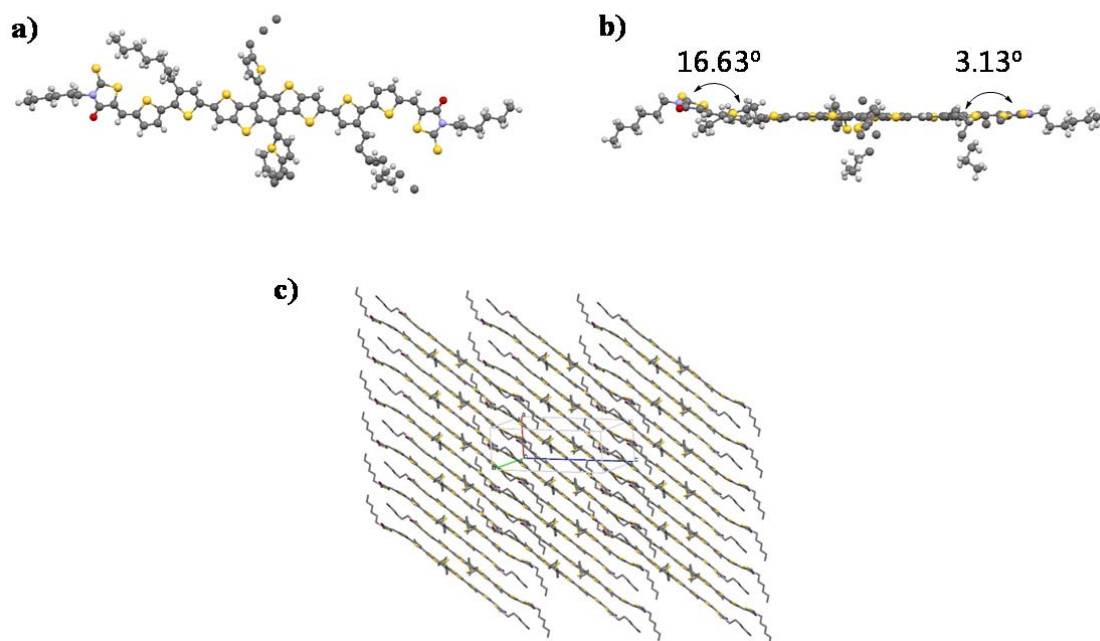

**Supplementary Figure 7.** Molecular conformation of ZR1 in the single crystal, top view (a) and side view(b), (c) crystal packing of ZR1 backbones in the (010) plane.



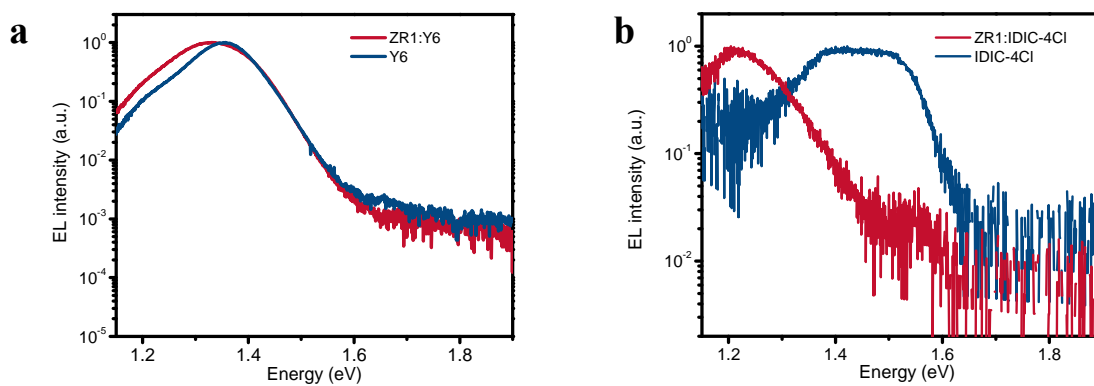

**Supplementary Figure 8.** (a–b) Electroluminescence spectrum of blend film and pure film.

## Supplementary Tables

**Supplementary Table 1.** Optical properties and electrochemical of ZR1, Y6 and IDIC-4Cl.

| Compound | $\lambda_{\max}^{\text{solution}}$<br>(nm) | $\lambda_{\max}^{\text{film}}$<br>(nm) | $E_{g,\text{film}}^{\text{opt}}$<br>(eV) | HOMO <sup>CV</sup><br>(eV) | LUMO <sup>CV</sup><br>(eV) |
|----------|--------------------------------------------|----------------------------------------|------------------------------------------|----------------------------|----------------------------|
| ZR1      | 534                                        | 620                                    | 1.84                                     | -5.32                      | -3.53                      |
| IDIC-4Cl | 689                                        | 756                                    | 1.53                                     | -5.91                      | -4.10                      |
| Y6       | 730                                        | 820                                    | 1.33                                     | -5.72                      | -4.10                      |

**Supplementary Table 2.** Device optimization of D:A ratios for ZR1: IDIC-4Cl at TA 120°C

| Donor/Acceptor | D:A   | $V_{\text{OC}}$ [V] | $J_{\text{SC}}$ [mA cm <sup>-2</sup> ] | FF [%] | PCE [%] |
|----------------|-------|---------------------|----------------------------------------|--------|---------|
| ZR1:IDIC-4Cl   | 1:0.6 | 0.789               | 17.14                                  | 66.37  | 9.08    |
| ZR1:IDIC-4Cl   | 1:0.7 | 0.776               | 18.27                                  | 67.96  | 9.64    |
| ZR1:IDIC-4Cl   | 1:0.8 | 0.785               | 17.53                                  | 66.03  | 9.20    |

**Supplementary Table 3.** Device optimization of thermal annealing temperature for ZR1: Y6 with

D:A 1:0.5

| Donor/Acceptor | TA    | $V_{\text{OC}}$ [V] | $J_{\text{SC}}$ [mA cm <sup>-2</sup> ] | FF [%] | PCE [%] |
|----------------|-------|---------------------|----------------------------------------|--------|---------|
| ZR1:Y6         | no    | 0.876               | 14.23                                  | 40.50  | 5.05    |
| ZR1:Y6         | 110°C | 0.870               | 24.02                                  | 66.20  | 13.62   |
| ZR1:Y6         | 120°C | 0.861               | 24.34                                  | 68.44  | 14.34   |
| ZR1:Y6         | 140°C | 0.837               | 24.49                                  | 67.90  | 13.91   |

**Supplementary Table 4.** Device optimization of D:A ratios for ZR1: Y6 at TA 120°C

| <b>Donor/Acceptor</b> | <b>D:A</b> | <b>V<sub>OC</sub> [V]</b> | <b>J<sub>SC</sub> [mA cm<sup>-2</sup>]</b> | <b>FF [%]</b> | <b>PCE [%]</b> |
|-----------------------|------------|---------------------------|--------------------------------------------|---------------|----------------|
| <b>ZR1:Y6</b>         | 1:0.4      | 0.855                     | 20.56                                      | 67.07         | 11.80          |
| <b>ZR1:Y6</b>         | 1:0.5      | 0.861                     | 24.34                                      | 68.44         | 14.34          |
| <b>ZR1:Y6</b>         | 1:0.6      | 0.869                     | 21.18                                      | 62.24         | 11.46          |

**Supplementary Table 5.** Device optimization of solvent annealing with THF for ZR1: Y6 at TA

120°C

| <b>Donor/Acceptor</b> | <b>D:A</b> | <b>V<sub>OC</sub> [V]</b> | <b>J<sub>SC</sub> [mA cm<sup>-2</sup>]</b> | <b>FF [%]</b> | <b>TA (°C)</b> | <b>SVA</b> | <b>PCE [%]</b> |
|-----------------------|------------|---------------------------|--------------------------------------------|---------------|----------------|------------|----------------|
| <b>ZR1:Y6</b>         | 1:0.5      | 0.861                     | 24.34                                      | 68.44         | 120            | no         | 14.34          |
| <b>ZR1:Y6</b>         | 1:0.6      | 0.851                     | 22.46                                      | 62.58         | 120            | THF (40s)  | 11.97          |

**Supplementary Table 6.** Device comparison of ZR1:Y6, ZR1-T:Y6, ZR1-3T:Y6 blends at TA 120°C

| <b>Donor/Acceptor</b> | <b>D:A</b> | <b>V<sub>OC</sub> [V]</b> | <b>J<sub>SC</sub> [mA cm<sup>-2</sup>]</b> | <b>FF [%]</b> | <b>PCE [%]</b> |
|-----------------------|------------|---------------------------|--------------------------------------------|---------------|----------------|
| <b>ZR1:Y6</b>         | 1:0.5      | 0.861                     | 24.34                                      | 68.44         | 14.34          |
| <b>ZR1-T:Y6</b>       | 1:0.6      | 0.498                     | 0.0019                                     | 25.29         | 0.025          |
| <b>ZR1-3T:Y6</b>      | 1:0.5      | 0.754                     | 22.51                                      | 45.47         | 7.67           |

**Supplementary Table 7.** Detailed RSoXS of the ZR1: Y6 blend films under different condition

| <b>System</b>            | <b>284.2eV<br/>circ.int</b> | <b>Thickness<br/>(nm)</b> | <b>SQRT<br/>(TSI/thickness)</b> | <b>Domain<br/>purity</b> | <b>Domain size<br/>(nm)</b> |
|--------------------------|-----------------------------|---------------------------|---------------------------------|--------------------------|-----------------------------|
| <b>ZR1:Y6<br/>no TA</b>  | 6.65E-09                    | 120                       | 7.4434E-06                      | 0.8752598                | 73.404                      |
| <b>ZR1:Y6<br/>110 °C</b> | 7.16E-09                    | 120                       | 7.72647E-06                     | 0.9085459                | 72.359                      |
| <b>ZR1:Y6<br/>120 °C</b> | 7.99E-09                    | 120                       | 8.16236E-06                     | 0.9598021                | 73.913                      |
| <b>ZR1:Y6<br/>140 °C</b> | 8.68E-09                    | 120                       | 8.50421E-06                     | 1                        | 83.412                      |

**Supplementary Table 8.** Hole mobility and electron mobility of blend films and pure films.

|                              | <b>ZR1: Y6</b>        | <b>ZR1: IDIC-4Cl</b>  | <b>ZR1</b>            | <b>Y6</b>             | <b>IDIC-4Cl</b>       |
|------------------------------|-----------------------|-----------------------|-----------------------|-----------------------|-----------------------|
| <b>Hole mobility</b>         | $1.32 \times 10^{-4}$ | $3.30 \times 10^{-4}$ | $3.53 \times 10^{-3}$ | -                     | -                     |
| <b>Electron<br/>mobility</b> | $3.92 \times 10^{-4}$ | $4.55 \times 10^{-4}$ | -                     | $2.29 \times 10^{-4}$ | $1.08 \times 10^{-4}$ |

## Supplementary Methods

**Materials and synthesis** Compounds 5 were purchased from Hyper Chemical Company, Compounds 4 and 8 were synthesized through the method described in the literature<sup>1,2</sup>, And the detailed synthetic processes of the other monomers and target small molecules were illustrated as follows.

**Compound 3:** A solution of Compound 1 (4.30 g, 13.34 mmol), Compound 2 (2.12 g, 11.12 mmol) and Cs<sub>2</sub>CO<sub>3</sub> (13.04g, 40.02mmol) in toluene (50 mL) was degassed by bubbling N<sub>2</sub> through the solution for 10 min. Pd(PPh<sub>3</sub>)<sub>4</sub> (0.77 g, 0.68 mmol) was added and the resulting solution was vigorously refluxed overnight under inert atmosphere. The solution was cooled to room temperature and diluted with n-hexane, filtered and concentrated in vacuo. The crude product was purified by flash chromatography (SiO<sub>2</sub>, n-hexane, 5% EtOAc) to give Compound 3 (2.20 g, 7.19 mmol, 54% yield) as a yellow oil. <sup>1</sup>H NMR (400 MHz, CDCl<sub>3</sub>) δ 9.88 (s, 1H), 7.69 (d, J = 3.7 Hz, 1H), 7.27 (s, 1H), 7.21 (d, J = 3.7 Hz, 1H), 6.97 (d, J = 5.1 Hz, 1H), 2.85-2.75(m, 2H), 1.70-1.60 (m, 2H), 1.41 – 1.20 (m, 10H), 0.87 (t, J = 6.4 Hz, 3H).

**Compound 4:** To a stirred solution of **3** (2.28 g, 7.44 mmol) in CHCl<sub>3</sub> (20 mL) and acetic acid (10 mL) kept in the dark at 0 °C was added *N*-bromosuccinimide (1.32 g, 7.44 mmol). The solution was stirred before being stirred for 1.5 h, diluted with n-hexane and washed with water, NaHCO<sub>3</sub> (sat.) and brine. The organic layer was dried (MgSO<sub>4</sub>) and concentrated in vacuo. The crude product was purified via flash chromatography (SiO<sub>2</sub>, n-hexane, 0.5 – 6% EtOAc) to give Compound 4 (2.0 g, 5.2mmol, 70% yield) as a yellow oil. <sup>1</sup>H NMR (400 MHz, CDCl<sub>3</sub>) δ 9.86 (s, 1H), 7.67 (d, J = 3.7 Hz, 1H), 7.12 (d, J = 3.6 Hz, 1H), 6.91 (s, 1H), 2.72 (t, J = 7.7 Hz, 2H), 1.63-1.56 (m, J = 15.1, 7.5 Hz, 2H), 1.39 – 1.19 (m, 10H), 0.87 (t, J = 6.3 Hz, 3H).

**Compound 7:** Compound 5 (500mg, 0.44 mmol) and compound 6 (511 mg, 1.32mol) were dissolved into anhydrous toluene (40 mL) in a three-neck flask. The solution was flushed with nitrogen for 20 min, and Pd(PPh<sub>3</sub>)<sub>4</sub> (25.56 mg) was added into the solution quickly. Then, the solution was reacted at 110 °C for 72h under nitrogen protection. After cooling to room temperature, the toluene was removed under reduced pressure. The crude product was subsequently purified by column chromatography on silica gel (DCM) to afford compound c1 as red solid. <sup>1</sup>H NMR (400 MHz, CDCl<sub>3</sub>) δ 9.90 (s, 2H), 7.71 (d, J = 3.9 Hz, 2H), 7.34 (s, 2H), 7.22 (t, J = 3.3 Hz, 4H), 7.05 (d, J = 3.3 Hz, 2H), 7.02 (s, 2H), 2.99 (d, J = 6.6 Hz, 4H), 2.83–2.77 (m, 4H), 1.82 (dd, J = 11.9, 6.0 Hz, 2H), 1.68 (dd, J = 15.3, 7.5 Hz, 4H), 1.52–1.24 (m, 52H), 0.90 (dt, J = 20.6, 6.7 Hz, 18H). MALDI-TOF MS (m/z): 1411.1

**Compound ZR1:** Compound 7 (200 mg, 0.142 mmol) and Compound 8 (307 mg, 1.4 mmol) was dissolved in dry CHCl<sub>3</sub> (30 ml). After 3 drops of piperidine were added, the resulting solution was refluxed and stirred for 12 h under nitrogen. After cooling to room temperature, the reaction mixture was poured into water and extracted several times with chloroform. The organic phases were combined, washed with brine, and dried over anhydrous magnesium sulfate. Then the solvent was removed under reduced pressure, and the crude product was purified by column chromatography on silica gel (CHCl<sub>3</sub>) to yield Compound ZR1 as black solid. <sup>1</sup>H NMR (400 MHz, CDCl<sub>3</sub>) δ 7.65 (s, 2H), 7.20 (s, 2H), 7.15 (d, J = 3.3 Hz, 2H), 7.06 (s, 2H), 6.99 (d, J = 6.2 Hz, 4H), 6.73 (s, 2H), 3.94 (t, J = 7.3 Hz, 4H), 3.02 (s, 4H), 2.72 – 2.61 (m, 4H), 1.92 – 1.80 (m, 2H), 1.62 (d, J = 5.3 Hz, 8H), 1.35 (t, J = 34.6 Hz, 64H), 1.03 – 0.81 (m, 24H).MALDITOF MS (m/z): 1810.6

**Compound IDIC-4Cl:** Compound 9 (300 mg, 0.0.39mmol) and compound 10 (1022mg, 7.77 mmol) were dissolved in dry CHCl<sub>3</sub> (60 ml). After 1 ml of pyridine was added, the resulting solution was

refluxed and stirred for 12 h under nitrogen. After cooling to room temperature, the reaction mixture was poured into 200 ml methanol and filtered. The crude product was purified by column chromatography on silica gel using petroleum ether/dichloromethane (1:1) as eluent to yield IDIC-4Cl as powder.  $^1\text{H}$  NMR (400 MHz,  $\text{CDCl}_3$ )  $\delta$  9.00 (s, 2H), 8.79 (s, 2H), 7.96 (s, 2H), 7.75 (s, 2H), 7.63 (s, 2H), 2.08 (td,  $J = 13.0, 4.1$  Hz, 4H), 1.96 (td,  $J = 13.0, 4.1$  Hz, 4H), 1.20 (d,  $J = 7.2$  Hz, 48H), 0.80 (t,  $J = 6.8$  Hz, 12H). MALDI-TOF MS ( $m/z$ ): 1260.9

## Supplementary References

- 1 R. J. Kumar, J. M. MacDonald, T. B. Singh, L. J. Waddington, A. B. Holmes, *J. Am. Chem. Soc.* 2011, **133**, 8564.
- 2 C. V. Kumar, L. Cabau, E. N. Koukaras, S. A. Siddiqui, G. D. Sharma, E. Palomares, *Nanoscale* 2015, **7**, 7692.
